# Supplementary material for: Quantification of ions with identical mass-to-charge (m/z) ratios by velocity-map imaging mass spectrometry
Source: Royal Society of Chemistry journal article supplement (doi:10.1039/c3cp52219a), 2013-01-01
Supplement: c3cp52219a.pdf [file c3cp52219a.pdf]

Electronic Supplementary Information (ESI) for “Quantification of ions with identical mass-to-charge ( $m/z$ ) ratios by velocity-map imaging mass spectrometry” by James N Bull, Jason W L Lee and Claire Vallance.

Numerical tabulation of partial ionization cross-sections reported in Fig. 2, in units of  $\text{\AA}^2$ . Errors are given at the 95% confidence level.

| EE / eV | $m/z = 14$ (gross) | $m/z = 14$ error | $m/z = 28$ (gross) | $m/z = 28$ error | $N_2^{2+}$ (counting) | $N_2^{2+}$ error |
|---------|--------------------|------------------|--------------------|------------------|-----------------------|------------------|
| 20      |                    |                  | 0.522              | 0.035            |                       |                  |
| 25      |                    |                  | 0.828              | 0.030            |                       |                  |
| 30      | 0.093              | 0.034            | 1.036              | 0.027            |                       |                  |
| 35      | 0.147              | 0.004            | 1.238              | 0.022            |                       |                  |
| 40      | 0.195              | 0.005            | 1.396              | 0.021            |                       |                  |
| 45      | 0.260              | 0.007            | 1.496              | 0.020            | 0.0012                | 0.0006           |
| 50      | 0.336              | 0.009            | 1.581              | 0.020            | 0.0067                | 0.0009           |
| 55      | 0.388              | 0.010            | 1.634              | 0.020            | 0.0117                | 0.0016           |
| 60      | 0.412              | 0.010            | 1.725              | 0.044            | 0.0161                | 0.0019           |
| 65      | 0.436              | 0.011            | 1.802              | 0.024            | 0.0199                | 0.0023           |
| 70      | 0.476              | 0.012            | 1.814              | 0.023            | 0.0267                | 0.0028           |
| 75      | 0.520              | 0.013            | 1.830              | 0.023            | 0.0338                | 0.0037           |
| 80      | 0.537              | 0.014            | 1.879              | 0.024            | 0.0376                | 0.0036           |
| 85      | 0.535              | 0.014            | 1.897              | 0.025            | 0.0404                | 0.0042           |
| 90      | 0.559              | 0.014            | 1.915              | 0.025            | 0.0444                | 0.0043           |
| 95      | 0.587              | 0.015            | 1.914              | 0.024            | 0.0481                | 0.0046           |
| 100     | 0.600              | 0.015            | 1.913              | 0.024            | 0.0534                | 0.0049           |
